# Supplementary material for: Parity influences postpartum adaptations in the maternal gut microbiota
Source: Research Square preprint supplement (doi:10.21203/rs.3.rs-5972536/v1), 2025-04-07
Supplement: Supplementary file 1 [file 79d56fa81388949a61270f9d.xlsx]

## Sheet: corr
Correlation analysis between metabolic pathways and bacterial species
	k__Bacteria|p__Firmicutes|c__Clostridia|o__Clostridiales|f__Lachnospiraceae|g__Eisenbergiella|s__Eisenbergiella_tayi	k__Bacteria|p__Firmicutes|c__Clostridia|o__Clostridiales|f__Clostridiaceae|g__Clostridium|s__Clostridium_sp_Marseille_P3244	k__Bacteria|p__Firmicutes|c__Clostridia|o__Clostridiales|f__Ruminococcaceae|g__Ruminococcaceae_unclassified|s__Clostridium_leptum	k__Bacteria|p__Proteobacteria|c__Alphaproteobacteria|o__Rhizobiales|f__Bradyrhizobiaceae|g__Afipia|s__Afipia_broomeae	k__Bacteria|p__Proteobacteria|c__Alphaproteobacteria|o__Rhizobiales|f__Bradyrhizobiaceae|g__Bradyrhizobium|s__Bradyrhizobium_elkanii	k__Bacteria|p__Firmicutes|c__Clostridia|o__Clostridiales|f__Ruminococcaceae|g__Anaeromassilibacillus|s__Anaeromassilibacillus_sp_An250	k__Bacteria|p__Firmicutes|c__Clostridia|o__Clostridiales|f__Ruminococcaceae|g__Harryflintia|s__Harryflintia_acetispora	k__Bacteria|p__Firmicutes|c__Clostridia|o__Clostridiales|f__Ruminococcaceae|g__Anaerotruncus|s__Anaerotruncus_rubiinfantis	k__Bacteria|p__Firmicutes|c__Clostridia|o__Clostridia_unclassified|f__Clostridia_unclassified|g__Candidatus_Pararuminococcus|s__Candidatus_Pararuminococcus_gallinarum	k__Bacteria|p__Firmicutes|c__Clostridia|o__Clostridiales|f__Eubacteriaceae|g__Eubacterium|s__Eubacterium_sp_AF15_50	k__Bacteria|p__Firmicutes|c__Clostridia|o__Clostridiales|f__Christensenellaceae|g__Christensenellaceae_unclassified|s__Christensenellaceae_bacterium	k__Bacteria|p__Firmicutes|c__Clostridia|o__Clostridia_unclassified|f__Clostridia_unclassified|g__Clostridia_unclassified|s__Clostridia_bacterium	k__Bacteria|p__Firmicutes|c__Clostridia|o__Clostridiales|f__Ruminococcaceae|g__Ruminococcaceae_unclassified|s__Eubacterium_siraeum	k__Bacteria|p__Firmicutes|c__Clostridia|o__Clostridia_unclassified|f__Clostridia_unclassified|g__Candidatus_Geddesella|s__Candidatus_Geddesella_stercoravicola	k__Bacteria|p__Firmicutes|c__Clostridia|o__Clostridiales|f__Ruminococcaceae|g__Ruminococcaceae_unclassified|s__Ruminococcaceae_bacterium_D5	k__Bacteria|p__Firmicutes|c__Firmicutes_unclassified|o__Firmicutes_unclassified|f__Firmicutes_unclassified|g__Firmicutes_unclassified|s__Firmicutes_bacterium	k__Bacteria|p__Firmicutes|c__Clostridia|o__Clostridiales|f__Peptostreptococcaceae|g__Romboutsia|s__Romboutsia_timonensis	k__Bacteria|p__Firmicutes|c__Clostridia|o__Clostridiales|f__Lachnospiraceae|g__Tyzzerella|s__Tyzzerella_nexilis	k__Bacteria|p__Actinobacteria|c__Actinobacteria|o__Bifidobacteriales|f__Bifidobacteriaceae|g__Bifidobacterium|s__Bifidobacterium_angulatum	k__Bacteria|p__Firmicutes|c__Clostridia|o__Clostridiales|f__Ruminococcaceae|g__Ruminococcus|s__Ruminococcus_sp_NSJ_71	k__Bacteria|p__Firmicutes|c__Clostridia|o__Clostridiales|f__Lachnospiraceae|g__Lachnospira|s__Lachnospira_eligens	k__Bacteria|p__Firmicutes|c__Clostridia|o__Clostridiales|f__Lachnospiraceae|g__Faecalicatena|s__Faecalicatena_fissicatena	k__Bacteria|p__Bacteroidetes|c__Bacteroidia|o__Bacteroidales|f__Rikenellaceae|g__Alistipes|s__Alistipes_ihumii	k__Bacteria|p__Firmicutes|c__Clostridia|o__Clostridiales|f__Ruminococcaceae|g__Gemmiger|s__Gemmiger_formicilis	k__Bacteria|p__Firmicutes|c__Clostridia|o__Clostridiales|f__Oscillospiraceae|g__Oscillospiraceae_unclassified|s__Oscillospiraceae_bacterium_NSJ_64	k__Bacteria|p__Bacteroidetes|c__Bacteroidia|o__Bacteroidales|f__Prevotellaceae|g__Prevotella|s__Prevotella_copri_clade_A	k__Bacteria|p__Firmicutes|c__Clostridia|o__Clostridiales|f__Lachnospiraceae|g__Lacrimispora|s__Lacrimispora_amygdalina	k__Bacteria|p__Firmicutes|c__Clostridia|o__Clostridiales|f__Clostridiaceae|g__Clostridium|s__Clostridium_sp_AF15_49	k__Bacteria|p__Firmicutes|c__Clostridia|o__Clostridiales|f__Clostridiaceae|g__Clostridium|s__Clostridium_sp_AM33_3	k__Bacteria|p__Firmicutes|c__Clostridia|o__Clostridiales|f__Clostridiales_unclassified|g__Clostridiales_unclassified|s__Clostridiales_bacterium	k__Bacteria|p__Bacteroidetes|c__Bacteroidia|o__Bacteroidales|f__Tannerellaceae|g__Parabacteroides|s__Parabacteroides_distasonis	k__Bacteria|p__Firmicutes|c__Clostridia|o__Clostridiales|f__Oscillospiraceae|g__Dysosmobacter|s__Dysosmobacter_welbionis	k__Bacteria|p__Firmicutes|c__Clostridia|o__Clostridiales|f__Clostridiaceae|g__Clostridium|s__Clostridium_sp_AF34_10BH	k__Bacteria|p__Firmicutes|c__Clostridia|o__Clostridiales|f__Lachnospiraceae|g__Roseburia|s__Roseburia_hominis	k__Bacteria|p__Firmicutes|c__Clostridia|o__Clostridiales|f__Lachnospiraceae|g__Mediterraneibacter|s__Ruminococcus_lactaris	k__Bacteria|p__Bacteroidetes|c__Bacteroidia|o__Bacteroidales|f__Bacteroidaceae|g__Bacteroides|s__Bacteroides_caccae	k__Bacteria|p__Bacteroidetes|c__Bacteroidia|o__Bacteroidales|f__Bacteroidaceae|g__Bacteroides|s__Bacteroides_stercoris
PWY-7199: pyrimidine deoxyribonucleosides salvage	-0.4	-0.3	-0.3	-0.1	-0.1	0	-0.1	-0.3	0.1	-0.1	-0.2	-0.1	-0.1	-0.1	-0.1	-0.1	-0.2	-0.2	-0.2	-0.1	0.1	0.3	0.1	0.1	0.1	0.4	0.3	0.3	0.3	0.2	0	0.4	0.4	0.3	0.1	0.2	0.3
PWY-5505: L-glutamate and L-glutamine biosynthesis	-0.4	-0.3	-0.3	-0.3	-0.3	-0.2	-0.3	-0.2	-0.3	-0.1	0	0.1	-0.1	-0.2	-0.2	-0.1	0	0.1	0	0.1	0.3	0.5	0	0.3	0.3	0.2	0.3	0.3	0.2	0.1	0	0.1	0.3	0.3	0.1	0.3	0.2
GLUCUROCAT-PWY: superpathway of &beta;-D-glucuronosides degradation	-0.3	-0.1	0	-0.3	-0.3	0	0	-0.4	-0.2	-0.1	0.1	0	-0.2	-0.2	-0.3	-0.2	0.1	-0.1	-0.1	0	0.2	0.2	0.2	0.1	0	-0.1	0.2	0	0.2	0.4	0.2	0.2	0.2	0.2	0.2	0.3	0.2
GALACTUROCAT-PWY: D-galacturonate degradation I	-0.3	0	0	-0.3	-0.2	-0.1	-0.2	-0.4	-0.2	0	0.1	0.1	-0.2	0	-0.3	-0.2	0.1	-0.1	0.1	-0.1	0.3	0.3	0.2	0.1	-0.1	0.1	0.1	0.1	0.1	0.3	0	0.1	0.4	0.3	0.3	0.3	0.3
PWY-7242: D-fructuronate degradation	-0.4	-0.2	-0.1	-0.3	-0.3	-0.1	-0.1	-0.4	-0.3	-0.2	0	0	-0.2	-0.2	-0.3	-0.2	0.1	-0.1	0	-0.1	0.2	0.3	0.1	0	0	0.2	0.2	0.1	0.2	0.2	0	0.1	0.3	0.3	0.2	0.3	0.3
PWY-6507: 4-deoxy-L-threo-hex-4-enopyranuronate degradation	-0.4	-0.2	-0.2	-0.2	-0.2	-0.2	-0.2	-0.4	-0.3	-0.1	0	0	-0.2	-0.2	-0.3	-0.2	0.1	-0.1	0.1	-0.1	0.3	0.3	0	0.1	0	0.2	0.3	0.1	0.2	0.2	0	0.1	0.4	0.3	0.3	0.3	0.3
PWY-6608: guanosine nucleotides degradation III	-0.2	-0.2	-0.1	-0.2	-0.2	-0.2	-0.3	-0.4	-0.4	-0.5	-0.2	-0.1	-0.3	-0.2	-0.3	-0.2	0.1	0	0	0	-0.1	0	0.1	-0.1	0	-0.2	0	-0.1	0	0.2	0.1	0	0	0.2	0.1	0.2	0.1
SALVADEHYPOX-PWY: adenosine nucleotides degradation II	-0.2	-0.1	-0.1	-0.2	-0.2	-0.2	-0.3	-0.4	-0.5	-0.3	-0.1	-0.1	-0.3	-0.1	-0.2	-0.2	0.1	0.1	0.1	0	0	0.1	0.1	0	0	-0.1	0	-0.1	0	0	0	0	0	0.1	0.1	0.2	0.2
PWY-6353: purine nucleotides degradation II (aerobic)	-0.2	-0.2	-0.1	-0.2	-0.2	-0.2	-0.2	-0.4	-0.5	-0.4	-0.2	-0.1	-0.3	-0.1	-0.2	-0.2	0.1	0	0	0	-0.1	0.1	0.1	0	0	-0.2	0	-0.1	0	0.1	0.1	0	0	0.1	0.2	0.2	0.2
PWY4LZ-257: superpathway of fermentation (Chlamydomonas reinhardtii)	0	-0.2	-0.2	-0.2	-0.2	-0.1	-0.2	-0.2	-0.4	-0.5	-0.1	-0.1	-0.1	-0.1	-0.2	-0.1	-0.1	0	-0.2	-0.1	0.1	0.2	0	0.1	0	-0.1	0.1	0	0	0.2	0.1	0.1	0.1	0.2	0.1	0.2	0.1
P441-PWY: superpathway of N-acetylneuraminate degradation	0.1	0	-0.1	-0.3	-0.3	-0.2	-0.2	-0.3	-0.5	-0.4	-0.2	-0.1	-0.1	0	-0.3	-0.3	0	0	0	0	0	0	0	0	-0.1	-0.2	-0.1	0	0	0.1	0	-0.1	0	0.1	0.1	0.1	0.1
PWY-7761: NAD salvage pathway II (PNC IV cycle)	0	-0.1	-0.3	-0.2	-0.3	-0.3	-0.4	-0.4	-0.4	-0.3	-0.3	-0.1	-0.2	-0.1	-0.3	-0.4	0	-0.1	-0.1	-0.2	0.1	0.2	-0.2	-0.1	-0.2	0.2	-0.1	0.2	0	0	-0.1	-0.1	0	0.2	0.1	0.1	0.2
GLUCONEO-PWY: gluconeogenesis I	-0.2	-0.2	-0.4	-0.3	-0.4	-0.2	-0.2	-0.4	-0.3	-0.1	-0.1	0	-0.1	-0.1	-0.3	-0.2	-0.1	0	0.1	-0.1	0.1	0.3	-0.1	0.1	0.1	0.1	0	0.1	0.1	0	-0.1	0.1	0.2	0.1	0.3	0.2	0.2
FERMENTATION-PWY: mixed acid fermentation	-0.3	-0.1	-0.2	-0.4	-0.4	-0.2	-0.4	-0.3	-0.4	-0.3	-0.1	-0.1	-0.2	-0.3	-0.3	-0.4	0.3	0.2	0	0	0.1	0.2	-0.2	0	0	0.3	0.1	0.1	-0.1	0	-0.1	-0.1	0.2	0.1	0.2	0.2	0.2
GALACT-GLUCUROCAT-PWY: superpathway of hexuronide and hexuronate degradation	0	0.1	-0.1	0	0	0	0	-0.1	-0.1	-0.1	0.1	0.1	-0.1	0	0	-0.1	-0.1	0.1	0	0	0.2	0.2	0.3	0.1	0	-0.1	0	0	0.1	0.2	0.2	0.1	0.1	0.1	0.3	0.2	0
PWY-8004: Entner-Doudoroff pathway I	-0.1	-0.1	-0.2	-0.4	-0.4	-0.1	0	-0.2	-0.1	0.1	0	-0.1	-0.1	-0.1	-0.2	0	0	-0.2	0.2	-0.1	0.2	0.3	0	0.2	-0.2	-0.3	-0.1	-0.1	0	0.2	0.3	0.1	0	0	0.3	0.2	0.2
GLYCOLYSIS-E-D: superpathway of glycolysis and the Entner-Doudoroff pathway	-0.1	-0.1	-0.2	-0.2	-0.2	0	0	-0.2	-0.1	0.1	0	0	0	0	0	0.1	0	-0.1	0.1	0	0.1	0.1	0.1	0	0	-0.3	-0.1	-0.1	0.1	0.2	0.2	0.1	-0.1	0	0.3	0.1	0
GLYCOLYSIS: glycolysis I (from glucose 6-phosphate)	-0.2	-0.3	-0.3	-0.1	-0.1	-0.2	0	-0.4	-0.2	-0.2	-0.1	0	-0.1	0	0	0	-0.2	-0.2	0	0	0.2	0.1	0	-0.1	0	-0.2	-0.1	0	0.2	0.2	0	0	0.2	0.2	0.3	0	0.2
PWY-5484: glycolysis II (from fructose 6-phosphate)	-0.1	-0.3	-0.3	0	0	-0.1	0	-0.3	-0.2	-0.1	0	0	-0.1	0	0	0	-0.3	-0.2	0	0.1	0.2	0.1	0.1	-0.1	0	-0.3	-0.2	-0.1	0.2	0.2	0.1	0	0.2	0.1	0.3	0	0.2
PWY-7211: superpathway of pyrimidine deoxyribonucleotides de novo biosynthesis	-0.2	-0.2	-0.1	-0.2	-0.2	0.1	-0.1	-0.3	-0.2	-0.3	0.1	0	-0.1	0	-0.1	-0.1	-0.1	0.1	-0.1	0.1	0	0	0.1	-0.1	0	-0.2	0.1	-0.1	0.1	0.1	0.2	0.1	0	0.1	0.2	0.1	0.2
PWY-7210: pyrimidine deoxyribonucleotides biosynthesis from CTP	-0.3	-0.4	-0.3	-0.1	-0.1	0	-0.2	-0.4	-0.2	-0.2	0	0	-0.3	-0.1	0	-0.1	-0.2	0.1	-0.2	0	0.2	0.1	0.1	-0.1	0	-0.1	0	0	0.2	0.2	0.1	0.2	0.3	0.2	0.4	0.2	0.3
PWY-6545: pyrimidine deoxyribonucleotides de novo biosynthesis III	-0.3	-0.3	-0.2	-0.1	-0.1	0	-0.2	-0.4	-0.3	-0.4	-0.1	-0.1	-0.3	-0.1	-0.1	-0.1	-0.2	0.1	-0.1	0	0.1	0	0.1	-0.2	0	-0.1	0.1	-0.1	0.2	0.2	0.2	0.2	0.2	0.2	0.3	0.2	0.3
PWY-7184: pyrimidine deoxyribonucleotides de novo biosynthesis I	-0.3	-0.3	-0.2	-0.1	-0.1	0	-0.2	-0.5	-0.3	-0.4	-0.1	-0.2	-0.3	-0.1	-0.2	-0.2	-0.2	0	-0.1	-0.1	0	0	0	-0.2	0	-0.1	0	-0.1	0.1	0.1	0.2	0.2	0.2	0.1	0.3	0.1	0.3
PWY0-1061: superpathway of L-alanine biosynthesis	-0.1	0.1	0.3	-0.3	-0.3	-0.1	-0.2	0.1	-0.1	0	0.1	-0.1	0.1	0	-0.3	-0.1	0.3	0.3	0.3	0.3	-0.3	-0.2	0.1	0	0.2	-0.1	-0.1	-0.2	-0.4	-0.1	0	-0.2	-0.1	-0.1	-0.2	0.2	-0.2
PWY-7117: C4 photosynthetic carbon assimilation cycle, PEPCK type	0.2	0.2	0.2	-0.1	-0.1	0	-0.1	0.1	-0.1	0.1	0.1	0	0.2	0.2	0	0	0.3	0.2	0.3	0.2	-0.4	-0.4	0	-0.1	0	-0.2	-0.3	-0.2	-0.4	-0.5	-0.1	-0.2	-0.4	-0.4	-0.2	-0.2	-0.3
PWY-241: C4 photosynthetic carbon assimilation cycle, NADP-ME type	0.2	0.2	0.2	-0.1	-0.1	0	-0.1	0.2	-0.1	0.1	0.1	0	0.2	0.2	0	0	0.3	0.2	0.4	0.2	-0.4	-0.3	0	-0.1	0	-0.2	-0.3	-0.2	-0.4	-0.5	-0.2	-0.2	-0.4	-0.4	-0.2	-0.1	-0.3
THISYNARA-PWY: superpathway of thiamine diphosphate biosynthesis III (eukaryotes)	0.1	0.2	0.4	0.1	0.1	0.2	0.3	0.3	0.3	0.3	0.3	0.2	0.1	0.1	0.1	0.2	0.1	0.1	0.1	0.1	0.1	0	0.3	0.2	0	-0.5	-0.1	-0.3	-0.1	0.2	0.1	0.1	-0.2	-0.2	-0.2	-0.1	-0.2
SER-GLYSYN-PWY: superpathway of L-serine and glycine biosynthesis I	0.2	0.2	0.3	0.2	0.2	0.2	0.4	0.3	0.3	0.3	0.2	0.3	0.1	0.3	0.2	0.3	-0.3	-0.1	0.1	0.1	0	0.1	0.4	0.1	0	-0.6	-0.2	-0.3	0.1	0.3	0.1	0.2	-0.1	-0.1	0	-0.1	-0.2
PWY-7282: 4-amino-2-methyl-5-diphosphomethylpyrimidine biosynthesis II	0.2	0.3	0.3	0.1	0.1	0.3	0.3	0.3	0.4	0.2	0.2	0	0	0.2	0.3	0.3	-0.1	0	0	0	0.1	0.1	0.3	0	-0.1	-0.5	-0.2	-0.3	-0.2	0.3	0.3	0.3	-0.2	-0.2	0.1	0	0
PWY66-399: gluconeogenesis III	0.1	0.1	-0.2	-0.1	-0.1	0.1	0.1	0.2	0.1	0.1	0.3	0.6	0.4	0.2	0.2	0.3	-0.1	0.1	-0.1	0.1	0.2	0.2	0.1	0.2	0.2	0	0.1	0.2	0.2	0.2	-0.1	0.2	0	0.2	0.2	0	0.1
COMPLETE-ARO-PWY: superpathway of aromatic amino acid biosynthesis	0.1	0.2	0.3	0	0	0.1	0.1	0.4	0.4	0.3	0.5	0.6	0.3	0.3	0.2	0.4	0.2	0.2	0.2	0.1	0.1	0.3	0.1	0.3	0.2	-0.1	0.1	-0.1	0	0	-0.2	-0.2	0	0	-0.2	-0.1	-0.2
PWY-6470: peptidoglycan biosynthesis V (&beta;-lactam resistance)	0	0.1	0.2	-0.1	-0.1	0.2	0.1	0.4	0.2	0.2	0.5	0.4	0.4	0.2	0.1	0.3	0.3	0.2	0.1	0.4	0	0.1	0.2	0.3	0.3	-0.1	0.1	-0.1	-0.1	-0.1	-0.2	-0.1	-0.2	0.1	-0.1	-0.1	-0.3
HISTSYN-PWY: L-histidine biosynthesis	0	0.1	0.2	0.1	0.1	0.1	0.2	0.3	0.3	0.2	0.2	0.2	0.2	0	0	0.1	-0.1	0.1	0.1	0	0.1	0.1	0.2	0.1	0.1	-0.1	0	0	0.2	0	-0.1	0.1	0.1	-0.1	-0.2	-0.1	-0.1
COA-PWY: coenzyme A biosynthesis I (prokaryotic)	0	0.1	0.1	0.2	0.2	0.2	0.2	0.3	0.5	0.3	0.3	0.4	0.3	0.4	0.3	0.4	-0.1	-0.1	0	0.2	0.1	0.1	0.1	0.1	-0.1	-0.2	0	-0.1	0.2	0.1	0	-0.1	0.1	0.1	-0.2	-0.2	0
PWY-724: superpathway of L-lysine, L-threonine and L-methionine biosynthesis II	0	0.1	0.2	0.1	0.1	0.2	0.1	0.3	0.4	0.4	0.5	0.5	0.3	0.3	0.2	0.4	-0.1	0.1	0.2	0.3	0.2	0.2	0.3	0.3	0.2	-0.3	-0.2	-0.1	0.1	0.2	-0.1	-0.1	0	0.1	0	-0.1	-0.2
PWY-7111: pyruvate fermentation to isobutanol (engineered)	0.1	0.1	0.1	0	0	0.1	-0.1	0.3	0.1	0.3	0.3	0.3	0.2	0.2	0.1	0.2	0.2	0.3	0.2	0.2	0.1	0.1	0	0.2	0.1	-0.1	0	-0.1	-0.2	-0.2	-0.1	-0.4	0	0.1	-0.1	-0.1	-0.1
PWY-5100: pyruvate fermentation to acetate and lactate II	-0.1	-0.1	0	-0.3	-0.3	-0.1	-0.1	0.2	0	0.2	0.4	0.3	0.2	0.2	0.1	0.1	0.3	0.3	0.3	0.3	0.1	0.2	-0.1	0.2	0.2	0.1	-0.1	-0.1	-0.3	-0.2	-0.2	-0.4	0	0	-0.1	-0.2	-0.2
P41-PWY: pyruvate fermentation to acetate and (S)-lactate I	-0.1	0.1	0.1	-0.3	-0.3	0	0	0.2	0	0.3	0.4	0.3	0.2	0.2	0	0.2	0.2	0.3	0.3	0.4	0.1	0.3	0.1	0.3	0.2	-0.2	-0.1	-0.2	-0.3	-0.1	-0.1	-0.3	-0.1	0	-0.1	-0.1	-0.2
PWY-6936: seleno-amino acid biosynthesis (plants)	0.3	0.2	0.1	0.1	0.1	0	0	0.3	0.1	0.2	0.3	0.4	0.3	0.4	0.3	0.2	0.1	0.2	0.2	0.1	0	0.1	-0.2	0.1	0	-0.1	-0.2	-0.1	-0.1	-0.3	-0.2	-0.5	-0.2	-0.2	0	-0.3	-0.2
PWY-5188: tetrapyrrole biosynthesis I (from glutamate)	0.4	0.3	0.3	0.2	0.2	0.3	0.1	0.4	0.3	0.2	0.4	0.5	0.2	0.5	0.3	0.4	0.3	0	0	0.1	0	0	0	-0.1	0	-0.1	-0.1	-0.1	-0.1	-0.2	-0.2	-0.3	-0.3	0	0	-0.4	-0.2

## Sheet: pval
Correlation analysis between metabolic pathways and bacterial species
	k__Bacteria|p__Firmicutes|c__Clostridia|o__Clostridiales|f__Lachnospiraceae|g__Eisenbergiella|s__Eisenbergiella_tayi	k__Bacteria|p__Firmicutes|c__Clostridia|o__Clostridiales|f__Clostridiaceae|g__Clostridium|s__Clostridium_sp_Marseille_P3244	k__Bacteria|p__Firmicutes|c__Clostridia|o__Clostridiales|f__Ruminococcaceae|g__Ruminococcaceae_unclassified|s__Clostridium_leptum	k__Bacteria|p__Proteobacteria|c__Alphaproteobacteria|o__Rhizobiales|f__Bradyrhizobiaceae|g__Afipia|s__Afipia_broomeae	k__Bacteria|p__Proteobacteria|c__Alphaproteobacteria|o__Rhizobiales|f__Bradyrhizobiaceae|g__Bradyrhizobium|s__Bradyrhizobium_elkanii	k__Bacteria|p__Firmicutes|c__Clostridia|o__Clostridiales|f__Ruminococcaceae|g__Anaeromassilibacillus|s__Anaeromassilibacillus_sp_An250	k__Bacteria|p__Firmicutes|c__Clostridia|o__Clostridiales|f__Ruminococcaceae|g__Harryflintia|s__Harryflintia_acetispora	k__Bacteria|p__Firmicutes|c__Clostridia|o__Clostridiales|f__Ruminococcaceae|g__Anaerotruncus|s__Anaerotruncus_rubiinfantis	k__Bacteria|p__Firmicutes|c__Clostridia|o__Clostridia_unclassified|f__Clostridia_unclassified|g__Candidatus_Pararuminococcus|s__Candidatus_Pararuminococcus_gallinarum	k__Bacteria|p__Firmicutes|c__Clostridia|o__Clostridiales|f__Eubacteriaceae|g__Eubacterium|s__Eubacterium_sp_AF15_50	k__Bacteria|p__Firmicutes|c__Clostridia|o__Clostridiales|f__Christensenellaceae|g__Christensenellaceae_unclassified|s__Christensenellaceae_bacterium	k__Bacteria|p__Firmicutes|c__Clostridia|o__Clostridia_unclassified|f__Clostridia_unclassified|g__Clostridia_unclassified|s__Clostridia_bacterium	k__Bacteria|p__Firmicutes|c__Clostridia|o__Clostridiales|f__Ruminococcaceae|g__Ruminococcaceae_unclassified|s__Eubacterium_siraeum	k__Bacteria|p__Firmicutes|c__Clostridia|o__Clostridia_unclassified|f__Clostridia_unclassified|g__Candidatus_Geddesella|s__Candidatus_Geddesella_stercoravicola	k__Bacteria|p__Firmicutes|c__Clostridia|o__Clostridiales|f__Ruminococcaceae|g__Ruminococcaceae_unclassified|s__Ruminococcaceae_bacterium_D5	k__Bacteria|p__Firmicutes|c__Firmicutes_unclassified|o__Firmicutes_unclassified|f__Firmicutes_unclassified|g__Firmicutes_unclassified|s__Firmicutes_bacterium	k__Bacteria|p__Firmicutes|c__Clostridia|o__Clostridiales|f__Peptostreptococcaceae|g__Romboutsia|s__Romboutsia_timonensis	k__Bacteria|p__Firmicutes|c__Clostridia|o__Clostridiales|f__Lachnospiraceae|g__Tyzzerella|s__Tyzzerella_nexilis	k__Bacteria|p__Actinobacteria|c__Actinobacteria|o__Bifidobacteriales|f__Bifidobacteriaceae|g__Bifidobacterium|s__Bifidobacterium_angulatum	k__Bacteria|p__Firmicutes|c__Clostridia|o__Clostridiales|f__Ruminococcaceae|g__Ruminococcus|s__Ruminococcus_sp_NSJ_71	k__Bacteria|p__Firmicutes|c__Clostridia|o__Clostridiales|f__Lachnospiraceae|g__Lachnospira|s__Lachnospira_eligens	k__Bacteria|p__Firmicutes|c__Clostridia|o__Clostridiales|f__Lachnospiraceae|g__Faecalicatena|s__Faecalicatena_fissicatena	k__Bacteria|p__Bacteroidetes|c__Bacteroidia|o__Bacteroidales|f__Rikenellaceae|g__Alistipes|s__Alistipes_ihumii	k__Bacteria|p__Firmicutes|c__Clostridia|o__Clostridiales|f__Ruminococcaceae|g__Gemmiger|s__Gemmiger_formicilis	k__Bacteria|p__Firmicutes|c__Clostridia|o__Clostridiales|f__Oscillospiraceae|g__Oscillospiraceae_unclassified|s__Oscillospiraceae_bacterium_NSJ_64	k__Bacteria|p__Bacteroidetes|c__Bacteroidia|o__Bacteroidales|f__Prevotellaceae|g__Prevotella|s__Prevotella_copri_clade_A	k__Bacteria|p__Firmicutes|c__Clostridia|o__Clostridiales|f__Lachnospiraceae|g__Lacrimispora|s__Lacrimispora_amygdalina	k__Bacteria|p__Firmicutes|c__Clostridia|o__Clostridiales|f__Clostridiaceae|g__Clostridium|s__Clostridium_sp_AF15_49	k__Bacteria|p__Firmicutes|c__Clostridia|o__Clostridiales|f__Clostridiaceae|g__Clostridium|s__Clostridium_sp_AM33_3	k__Bacteria|p__Firmicutes|c__Clostridia|o__Clostridiales|f__Clostridiales_unclassified|g__Clostridiales_unclassified|s__Clostridiales_bacterium	k__Bacteria|p__Bacteroidetes|c__Bacteroidia|o__Bacteroidales|f__Tannerellaceae|g__Parabacteroides|s__Parabacteroides_distasonis	k__Bacteria|p__Firmicutes|c__Clostridia|o__Clostridiales|f__Oscillospiraceae|g__Dysosmobacter|s__Dysosmobacter_welbionis	k__Bacteria|p__Firmicutes|c__Clostridia|o__Clostridiales|f__Clostridiaceae|g__Clostridium|s__Clostridium_sp_AF34_10BH	k__Bacteria|p__Firmicutes|c__Clostridia|o__Clostridiales|f__Lachnospiraceae|g__Roseburia|s__Roseburia_hominis	k__Bacteria|p__Firmicutes|c__Clostridia|o__Clostridiales|f__Lachnospiraceae|g__Mediterraneibacter|s__Ruminococcus_lactaris	k__Bacteria|p__Bacteroidetes|c__Bacteroidia|o__Bacteroidales|f__Bacteroidaceae|g__Bacteroides|s__Bacteroides_caccae	k__Bacteria|p__Bacteroidetes|c__Bacteroidia|o__Bacteroidales|f__Bacteroidaceae|g__Bacteroides|s__Bacteroides_stercoris
PWY-7199: pyrimidine deoxyribonucleosides salvage	0.0043	0.02904	0.0448	0.65383	0.70874	0.74034	0.66004	0.06722	0.59482	0.42258	0.20398	0.41724	0.67764	0.30247	0.56777	0.61726	0.07979	0.08267	0.15468	0.66011	0.32746	0.0739	0.48932	0.52184	0.67933	0.00917	0.0166	0.05422	0.03855	0.20162	0.94475	0.00929	0.00261	0.03467	0.45101	0.15971	0.03133
PWY-5505: L-glutamate and L-glutamine biosynthesis	0.00998	0.05957	0.0125	0.01863	0.02878	0.28299	0.04053	0.09389	0.06505	0.39208	0.99883	0.39137	0.551	0.19126	0.12939	0.37898	0.91773	0.46208	0.86983	0.61013	0.01501	0.00021	0.72836	0.04606	0.03222	0.11542	0.03784	0.02775	0.22973	0.45057	0.99096	0.49451	0.0361	0.02239	0.36585	0.01257	0.10574
GLUCUROCAT-PWY: superpathway of &beta;-D-glucuronosides degradation	0.0168	0.4561	0.79138	0.04745	0.05149	0.81598	0.87633	0.0076	0.14787	0.37941	0.63077	0.97798	0.16084	0.15951	0.02271	0.16749	0.50995	0.31033	0.69887	0.85401	0.21417	0.0993	0.12924	0.70205	0.73225	0.50422	0.18279	0.88286	0.24041	0.01012	0.25345	0.14813	0.12381	0.14018	0.14653	0.03584	0.12924
GALACTUROCAT-PWY: D-galacturonate degradation I	0.05991	0.83925	0.84228	0.07195	0.0938	0.68238	0.26685	0.00828	0.22312	0.87099	0.67312	0.61687	0.14988	0.77129	0.03305	0.17498	0.6403	0.48018	0.6231	0.57777	0.04039	0.01586	0.23647	0.32793	0.71017	0.59321	0.29494	0.34883	0.34547	0.06123	0.84745	0.48359	0.00932	0.05765	0.06949	0.02185	0.04028
PWY-7242: D-fructuronate degradation	0.0048	0.29239	0.654	0.05147	0.06041	0.47215	0.38846	0.00314	0.06939	0.24148	0.80313	0.98733	0.18391	0.08701	0.01778	0.08095	0.44407	0.57243	0.84506	0.57142	0.1295	0.06566	0.54535	0.75422	0.83727	0.25816	0.08494	0.4948	0.17283	0.08733	0.83748	0.35955	0.03093	0.05619	0.10287	0.04042	0.07626
PWY-6507: 4-deoxy-L-threo-hex-4-enopyranuronate degradation	0.0018	0.1841	0.1646	0.0792	0.10741	0.24754	0.28162	0.00121	0.05551	0.48292	0.91147	0.9241	0.1081	0.19958	0.07612	0.21588	0.41082	0.63385	0.64864	0.63153	0.07139	0.02586	0.77387	0.65122	0.79562	0.15657	0.04449	0.39285	0.16886	0.16334	0.83466	0.63475	0.01153	0.01768	0.03619	0.04008	0.01377
PWY-6608: guanosine nucleotides degradation III	0.14845	0.08068	0.6838	0.07798	0.08621	0.23676	0.01928	0.00517	0.00137	0.00034	0.26402	0.51036	0.06597	0.21123	0.06148	0.16989	0.63377	0.73601	0.96326	0.85075	0.70621	0.91372	0.67799	0.56141	0.92308	0.22159	0.86041	0.64415	0.74562	0.18173	0.30308	0.96432	0.86596	0.20347	0.30894	0.10034	0.31812
SALVADEHYPOX-PWY: adenosine nucleotides degradation II	0.22009	0.39833	0.50065	0.09785	0.11959	0.24511	0.05679	0.00494	0.00022	0.01636	0.38327	0.67668	0.04058	0.52783	0.17093	0.15058	0.3171	0.69225	0.61979	0.95401	0.84312	0.32544	0.61347	0.8739	0.96285	0.31128	0.90658	0.67877	0.83862	0.80822	0.78204	0.91008	0.8276	0.53289	0.33609	0.20134	0.07762
PWY-6353: purine nucleotides degradation II (aerobic)	0.16365	0.22967	0.46114	0.15038	0.17543	0.23025	0.10018	0.00735	0.00013	0.00444	0.22573	0.65095	0.03987	0.51992	0.12962	0.20657	0.59363	0.75724	0.9198	0.92734	0.67894	0.3483	0.51466	0.85233	0.80343	0.11324	0.74477	0.55303	0.73307	0.47811	0.42501	0.87518	0.81215	0.56538	0.2772	0.16006	0.16866
PWY4LZ-257: superpathway of fermentation (Chlamydomonas reinhardtii)	0.84976	0.28755	0.10261	0.09064	0.10216	0.67842	0.0948	0.09232	0.00459	0.00029	0.56233	0.50566	0.62387	0.46231	0.0836	0.49022	0.60211	0.88905	0.25452	0.45042	0.45457	0.10289	0.96416	0.67388	0.90516	0.29695	0.62635	0.95852	0.9731	0.15669	0.65044	0.42816	0.49935	0.1498	0.34009	0.17965	0.36576
P441-PWY: superpathway of N-acetylneuraminate degradation	0.57213	0.75026	0.30037	0.02056	0.01675	0.19162	0.09578	0.01952	0.00059	0.00693	0.29042	0.55199	0.62901	0.98962	0.02328	0.07082	0.80687	0.7783	0.75022	0.87832	0.81478	0.99821	0.99863	0.86413	0.43108	0.07889	0.33051	0.79966	0.78856	0.67331	0.89256	0.63097	0.96183	0.62705	0.49268	0.45858	0.57193
PWY-7761: NAD salvage pathway II (PNC IV cycle)	0.90469	0.58837	0.05768	0.09844	0.07485	0.04095	0.00513	0.00141	0.0031	0.03016	0.04721	0.53536	0.17306	0.5892	0.04437	0.00367	0.78352	0.48441	0.66542	0.19869	0.54653	0.23478	0.25647	0.35663	0.15838	0.16235	0.29843	0.22223	0.92776	0.88255	0.55922	0.5907	0.9647	0.23158	0.56253	0.43033	0.16262
GLUCONEO-PWY: gluconeogenesis I	0.15356	0.12669	0.00145	0.01321	0.01144	0.12988	0.09278	0.00155	0.0144	0.44089	0.61255	0.92785	0.67722	0.40429	0.04577	0.13419	0.66398	0.96977	0.45662	0.60775	0.30561	0.067	0.45715	0.46423	0.67747	0.56956	0.86281	0.43939	0.42628	0.84548	0.70123	0.71444	0.24409	0.4846	0.05271	0.11275	0.09329
FERMENTATION-PWY: mixed acid fermentation	0.01775	0.51765	0.16157	0.00136	0.00187	0.11179	0.00271	0.01932	0.00201	0.05166	0.70561	0.68708	0.17967	0.05381	0.03514	0.00881	0.06219	0.24485	0.91269	0.87298	0.70353	0.10283	0.17702	0.9954	0.7553	0.03953	0.40871	0.47114	0.62301	0.82789	0.57198	0.59779	0.2729	0.31411	0.26267	0.1641	0.16452
GALACT-GLUCUROCAT-PWY: superpathway of hexuronide and hexuronate degradation	0.78542	0.65918	0.5367	0.95954	0.96047	0.77345	0.8641	0.52963	0.46585	0.47852	0.37804	0.63937	0.33701	0.93215	0.76846	0.60184	0.51803	0.68058	0.8107	0.95373	0.2425	0.0906	0.0418	0.52849	0.76274	0.29384	0.92797	0.93225	0.30898	0.08968	0.20536	0.65139	0.31226	0.4586	0.04698	0.24614	0.81053
PWY-8004: Entner-Doudoroff pathway I	0.41492	0.632	0.17798	0.00445	0.00309	0.55022	0.91303	0.11061	0.31632	0.50177	0.8432	0.59079	0.5951	0.58972	0.24472	0.83545	0.98262	0.29172	0.28833	0.65641	0.19559	0.05141	0.99393	0.26788	0.22231	0.03908	0.69695	0.68348	0.76044	0.10359	0.01809	0.59616	0.79937	0.81207	0.05275	0.09023	0.27137
GLYCOLYSIS-E-D: superpathway of glycolysis and the Entner-Doudoroff pathway	0.71263	0.35566	0.14176	0.14327	0.11625	0.89137	0.80096	0.23998	0.54557	0.39975	0.83085	0.85233	0.78778	0.74006	0.86887	0.7072	0.84634	0.35135	0.60056	0.81043	0.31445	0.63463	0.66771	0.90758	0.91059	0.07261	0.40781	0.4694	0.68834	0.27866	0.10697	0.4685	0.60984	0.81816	0.02194	0.69391	0.94838
GLYCOLYSIS: glycolysis I (from glucose 6-phosphate)	0.18243	0.0123	0.01963	0.65252	0.60137	0.16945	0.76716	0.00431	0.13269	0.23351	0.70837	0.91769	0.492	0.93527	0.84987	0.9861	0.08045	0.22501	0.94755	0.75017	0.18211	0.34065	0.84238	0.55707	0.92778	0.1006	0.30656	0.76497	0.09299	0.199	0.90303	0.91665	0.16122	0.22594	0.04278	0.87263	0.20303
PWY-5484: glycolysis II (from fructose 6-phosphate)	0.30518	0.0277	0.0509	0.81315	0.74704	0.33069	0.97176	0.01549	0.27142	0.32513	0.80623	0.79782	0.47681	0.7278	0.91687	0.74392	0.05915	0.22786	0.95744	0.68509	0.20496	0.3326	0.61445	0.6642	0.91409	0.0239	0.19937	0.66052	0.11418	0.10233	0.59623	0.83715	0.2791	0.34645	0.0378	0.90789	0.25682
PWY-7211: superpathway of pyrimidine deoxyribonucleotides de novo biosynthesis	0.08964	0.10524	0.29571	0.22328	0.25578	0.51814	0.34542	0.04839	0.09001	0.03273	0.70322	0.92536	0.47196	0.9394	0.45246	0.66553	0.45112	0.38871	0.61145	0.59029	0.8312	0.96328	0.41849	0.43171	0.89476	0.22866	0.67869	0.55156	0.49011	0.39558	0.08243	0.38467	0.76059	0.54274	0.10759	0.51995	0.08062
PWY-7210: pyrimidine deoxyribonucleotides biosynthesis from CTP	0.02914	0.00922	0.05667	0.38438	0.47358	0.9607	0.1834	0.01104	0.13337	0.08152	0.72932	0.87226	0.0345	0.54901	0.8762	0.72195	0.10393	0.64959	0.14823	0.94777	0.24376	0.46052	0.66546	0.56429	0.75423	0.48032	0.95777	0.80804	0.21165	0.15137	0.36056	0.11855	0.0583	0.11827	0.00676	0.26733	0.05474
PWY-6545: pyrimidine deoxyribonucleotides de novo biosynthesis III	0.06237	0.0639	0.18217	0.56999	0.65648	0.80239	0.18715	0.00298	0.05599	0.00757	0.6723	0.70985	0.0717	0.47465	0.41018	0.32	0.23458	0.63728	0.4219	0.80943	0.5432	0.90454	0.61825	0.22983	0.99967	0.5446	0.55549	0.56935	0.18963	0.19063	0.21164	0.16267	0.1501	0.16502	0.03749	0.22272	0.03267
PWY-7184: pyrimidine deoxyribonucleotides de novo biosynthesis I	0.04412	0.04411	0.12091	0.43382	0.51259	0.95674	0.13768	0.00075	0.02415	0.00298	0.32236	0.17416	0.02874	0.33081	0.28286	0.16587	0.14665	0.78392	0.33262	0.60886	0.84202	0.78338	0.97866	0.09237	0.818	0.43222	0.93363	0.42984	0.38265	0.34891	0.2052	0.27464	0.28242	0.32296	0.07081	0.30315	0.02215
PWY0-1061: superpathway of L-alanine biosynthesis	0.69724	0.47286	0.04226	0.0451	0.05225	0.52086	0.20527	0.67847	0.51943	0.8914	0.33605	0.55514	0.58571	0.88981	0.06272	0.39864	0.02527	0.02365	0.04664	0.02472	0.07166	0.23056	0.63529	0.74342	0.20018	0.55468	0.72138	0.20383	0.0074	0.34292	0.81534	0.15315	0.60245	0.32474	0.11358	0.273	0.23019
PWY-7117: C4 photosynthetic carbon assimilation cycle, PEPCK type	0.26176	0.17667	0.1873	0.47461	0.4503	0.95211	0.71865	0.31899	0.5837	0.57648	0.54116	0.79026	0.20892	0.26511	0.95985	0.89187	0.05657	0.25552	0.01542	0.10634	0.00685	0.0093	0.84604	0.30567	0.84333	0.11347	0.03946	0.19065	0.00735	0.00078	0.30757	0.09869	0.0019	0.00219	0.09249	0.24545	0.03878
PWY-241: C4 photosynthetic carbon assimilation cycle, NADP-ME type	0.26269	0.16545	0.17323	0.477	0.455	0.97939	0.6935	0.27665	0.61635	0.52909	0.43351	0.92139	0.16327	0.2361	0.98642	0.96713	0.03228	0.21638	0.00985	0.08203	0.00934	0.01203	0.81404	0.39457	0.89827	0.15145	0.07128	0.23627	0.01133	0.00067	0.27343	0.10993	0.00298	0.00307	0.10163	0.30724	0.03168
THISYNARA-PWY: superpathway of thiamine diphosphate biosynthesis III (eukaryotes)	0.41914	0.08489	0.0024	0.48076	0.4672	0.10038	0.05467	0.01624	0.02909	0.01964	0.02765	0.10793	0.31475	0.31295	0.55601	0.10973	0.69345	0.59985	0.39732	0.36511	0.57851	0.85111	0.04647	0.13279	0.88289	0.00068	0.36076	0.07604	0.65715	0.26908	0.60327	0.63519	0.16012	0.22239	0.14466	0.53591	0.1483
SER-GLYSYN-PWY: superpathway of L-serine and glycine biosynthesis I	0.13962	0.14945	0.02699	0.14017	0.16853	0.22111	0.00345	0.05204	0.01593	0.03639	0.0965	0.06351	0.53421	0.06651	0.0803	0.02903	0.04918	0.61069	0.61994	0.49846	0.83395	0.52741	0.00196	0.42004	0.80346	0	0.12777	0.06026	0.50106	0.01762	0.45126	0.23366	0.41635	0.49928	0.94662	0.62189	0.10577
PWY-7282: 4-amino-2-methyl-5-diphosphomethylpyrimidine biosynthesis II	0.1476	0.0711	0.01449	0.30236	0.30161	0.01305	0.04731	0.02469	0.00572	0.12526	0.10216	0.87577	0.79252	0.15155	0.04095	0.02627	0.37191	0.76038	0.95467	0.84745	0.58294	0.30246	0.03531	0.90716	0.5324	0.00019	0.12993	0.05594	0.26034	0.02866	0.0699	0.07641	0.15958	0.14547	0.68575	0.80739	0.74383
PWY66-399: gluconeogenesis III	0.59153	0.6812	0.20921	0.62355	0.56981	0.33898	0.68384	0.1469	0.61736	0.49926	0.01333	1e-05	0.00743	0.21414	0.22993	0.01667	0.70777	0.5698	0.47345	0.60943	0.27576	0.09587	0.71388	0.12406	0.28489	0.86082	0.6593	0.18481	0.16276	0.19006	0.50942	0.23568	0.86633	0.16021	0.26823	0.97275	0.67546
COMPLETE-ARO-PWY: superpathway of aromatic amino acid biosynthesis	0.6232	0.28189	0.01974	0.8724	0.90959	0.50208	0.53077	0.00429	0.01106	0.01781	0.00023	1e-05	0.03022	0.05035	0.24509	0.00575	0.12267	0.25654	0.20097	0.45188	0.44254	0.05061	0.31898	0.04253	0.23874	0.43865	0.63381	0.32067	0.81251	0.9327	0.23802	0.12021	0.84369	0.88633	0.21481	0.52851	0.22384
PWY-6470: peptidoglycan biosynthesis V (&beta;-lactam resistance)	0.91261	0.38399	0.2226	0.66137	0.70824	0.20205	0.4032	0.00618	0.08916	0.14303	0.00019	0.00533	0.00252	0.12513	0.48885	0.01667	0.06927	0.23552	0.37883	0.01092	0.89583	0.47369	0.12398	0.05556	0.06128	0.55409	0.44565	0.588	0.66375	0.71235	0.26864	0.44549	0.15848	0.65146	0.63226	0.71562	0.021
HISTSYN-PWY: L-histidine biosynthesis	0.98894	0.39376	0.13311	0.44751	0.43127	0.46064	0.22281	0.05121	0.01519	0.13613	0.22806	0.10353	0.08503	0.80738	0.79421	0.36544	0.66188	0.66181	0.6691	0.8603	0.52056	0.69987	0.13457	0.29603	0.31822	0.35466	0.96308	0.89411	0.18838	0.77817	0.43795	0.34235	0.64269	0.38512	0.23657	0.52604	0.39648
COA-PWY: coenzyme A biosynthesis I (prokaryotic)	0.95725	0.67831	0.34472	0.15655	0.16001	0.16302	0.24199	0.02692	0.00035	0.07008	0.03714	0.00201	0.01894	0.00317	0.04984	0.00241	0.38539	0.49394	0.90892	0.24887	0.61272	0.3887	0.31822	0.36926	0.66463	0.10679	0.93214	0.41561	0.15682	0.51695	0.93522	0.65522	0.71692	0.5477	0.17839	0.19838	0.76234
PWY-724: superpathway of L-lysine, L-threonine and L-methionine biosynthesis II	0.85817	0.48533	0.09076	0.48323	0.46575	0.0786	0.31853	0.01785	0.00254	0.00953	0.00026	0.00011	0.04142	0.02356	0.09353	0.00416	0.67392	0.34091	0.14227	0.05562	0.09681	0.09485	0.04382	0.05827	0.10352	0.03171	0.28881	0.38153	0.71202	0.28025	0.51605	0.6016	0.7786	0.7202	0.98667	0.30661	0.28072
PWY-7111: pyruvate fermentation to isobutanol (engineered)	0.54063	0.65507	0.36277	0.79689	0.89738	0.6996	0.4227	0.06012	0.46322	0.07584	0.01319	0.0119	0.11861	0.12251	0.45203	0.18064	0.15854	0.07323	0.22102	0.17951	0.40891	0.5266	0.90548	0.28625	0.38011	0.44053	0.9044	0.40006	0.14996	0.26032	0.37826	0.00955	0.98893	0.72717	0.53787	0.44004	0.3012
PWY-5100: pyruvate fermentation to acetate and lactate II	0.39556	0.62741	0.74012	0.04272	0.04467	0.50252	0.41476	0.15424	0.9656	0.15084	0.00839	0.04594	0.12191	0.1395	0.64127	0.3364	0.06246	0.02214	0.01637	0.01642	0.40117	0.11753	0.43943	0.11011	0.22042	0.72693	0.70993	0.48186	0.0672	0.13165	0.21225	0.00321	0.74387	0.82254	0.40686	0.25262	0.14613
P41-PWY: pyruvate fermentation to acetate and (S)-lactate I	0.6276	0.70887	0.47369	0.05145	0.05737	0.93371	0.99491	0.09901	0.76381	0.0352	0.00309	0.02449	0.15508	0.08868	0.73633	0.17868	0.11348	0.03257	0.01379	0.00777	0.51507	0.07058	0.53831	0.03725	0.26352	0.17224	0.59418	0.18231	0.05413	0.52505	0.46379	0.02394	0.71867	0.90576	0.44728	0.37708	0.11462
PWY-6936: seleno-amino acid biosynthesis (plants)	0.04889	0.08248	0.45549	0.63376	0.71119	0.99384	0.85693	0.02463	0.49502	0.13616	0.01623	0.00248	0.05615	0.00593	0.05769	0.1578	0.41874	0.17741	0.12038	0.53097	0.81155	0.49861	0.15641	0.62339	0.80536	0.48405	0.12239	0.36395	0.38891	0.01568	0.2068	0.00012	0.22998	0.1613	0.74893	0.0128	0.13263
PWY-5188: tetrapyrrole biosynthesis I (from glutamate)	0.00991	0.07468	0.02252	0.09952	0.11134	0.04224	0.56286	0.00474	0.0589	0.13203	0.00342	0.00024	0.12542	0.00014	0.01225	0.00138	0.03293	0.92507	0.79129	0.46885	0.82644	0.77536	0.96527	0.69656	0.98169	0.49609	0.30328	0.52178	0.392	0.27227	0.09376	0.01476	0.06616	0.81899	0.9197	0.00687	0.08543
