# Supplementary material for: Parity influences postpartum adaptations in the maternal gut microbiota
Source: Research Square preprint supplement (doi:10.21203/rs.3.rs-5972536/v1), 2025-04-07
Supplement: Supplementary file 2 [file ddccee6da769de28fd5bda00.xlsx]

## Sheet: Лист1
Demographic characteristics of all subjects
	Cntrl	MM	P-value
Age, yrs. M±SD	32.1±4.79	30.0±5.2	0.12	Ind. T-test
Pregnancis, num. M±SD	3.41±1.71
Childbirth, num. M±SD	2.53±1.26
P-value, Pregnancies > Childbirths 0.0001064573942688964	Wilcox test
	#	%	More than half are obese ... ?	More than quarter are obese ...?
Obesity, no/yes	29/5	85/15 %	0.9999969175551087	0.9509066672741994
Cytomegalovirus, no/yes	28/6	82/18%	0.9999807209242135	0.8862041437294759
Vaginitis, no/yes	28/6	82/18%	0.9999807209242135	0.8862041437294759
Cervical_erosion	30/4	88/12%	0.9999807209242135	0.9832579290465611
Frequency_of_consumption_of_dairy_products, rarely/often	6/28	18/82%	9.756279177963734e-05	3.564227905872297e-12
Maternal_diseases_during_pregnancy			More than half are sick?	More than quarter are sick?
No	17		0.5679168797796592	0.0014614875689798826
ARI 10
COVID-19 4
Vegetovascular_dystonia 1
mastitis	1
ARI_COVID-19 1
	r	p
Pregnancies correlation with Childbirth	0.7	6.591602216750573e-07	Kendall tau
P-value half of Mothers have more than 1 pregnancies	P-value half of Mothers have more than 2 pregnancies	P-value half of Mothers have more than 3 pregnancies
0.0004106976557523012	0.028806336456909776	0.4320831202203408
P-value half of Mothers have more than 1 Childbirth	P-value half of Mothers have more than 2 Childbirth	P-value half of Mothers have more than 3 Childbirth
0.004520592745393515	0.4320831202203408	0.9999807209242135
